# Supplementary material
Source: PubMed Central journal article supplement (PMC8661001)
Supplement: mmc4.pdf [file mmc4.pdf]

**A**

|                    | PAM                                             | sgRNA                          |
|--------------------|-------------------------------------------------|--------------------------------|
| HeLa WT            | ACCC                                            | CTGCGGGCGGTGTGCGGACAGCCAGGCATG |
|                    | V R N R T L R A V C G Q P G M                   |                                |
| CHST14<br>Clone #3 | GTCCGGA-----AGCCAGGCATG                         |                                |
|                    | V R                                             | +K P G M                       |
| CHST14<br>Clone #4 | GTCCGGAAC-----CGGACAGCCAGGCATG                  |                                |
|                    | V R N                                           | fs                             |
| CHST14<br>Clone #4 | GTCCGGAACAGGACCCTGC - GGCGGTGTGCGGACAGCCAGGCATG |                                |
|                    | V R N R T L                                     | fs                             |
| CHST14<br>Clone #4 | GTCCGGAACAGGACCCTGC +A GGGCGGTGTGCGGACAGCCAGGCA |                                |
|                    | V R N R T L                                     | fs                             |

**B**

|                  | PAM                                            | sgRNA                  |
|------------------|------------------------------------------------|------------------------|
| HeLa WT          | CCCG                                           | GCTGGAGCGTGTGGTGTTCCTG |
|                  | N R T L G H R L E R V V F L                    |                        |
| CHPF<br>Clone #4 | AACCGCACGCTGGGGC-----GTGTGGTGTTCCTG            |                        |
|                  | N R T L G                                      | 12 bp deletion         |
| CHPF<br>Clone #4 | AACCGCACGCTGGGGCACCGGC-----GCGTGTGGTGTTCCTG    |                        |
|                  | N R T L G H R                                  | fs                     |
| CHPF<br>Clone #4 | TGAACCGCACGCTGGGGCACCGG-----AGCGTGTGGTGTTCCTGA |                        |
|                  | N R T L G H R                                  | fs                     |

**C**

|                   | PAM                                        | sgRNA                     |
|-------------------|--------------------------------------------|---------------------------|
| HeLa WT           | CCCT                                       | TCGGTTACTCTACTTCACTGGGCAG |
|                   | T V A H H F P R L L Y F T G Q              |                           |
| CHPF2<br>Clone #7 | ACGGTGGCCCATCACTTCCCTC-----TACTTCACTGGGCAG |                           |
|                   | T V A H H F P                              | fs                        |
