# Supplementary material
Source: PubMed Central journal article supplement (PMC8661001)

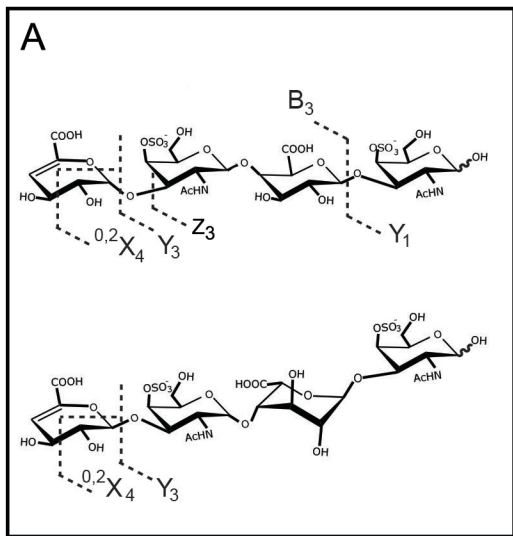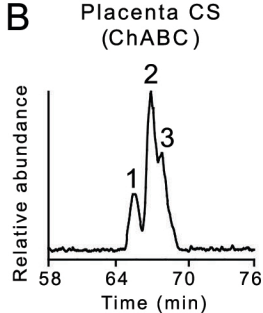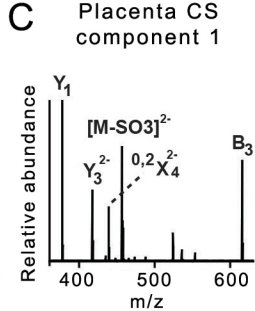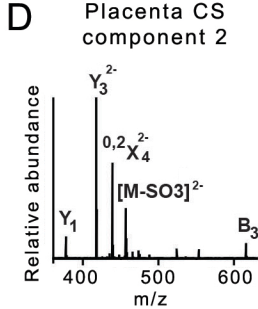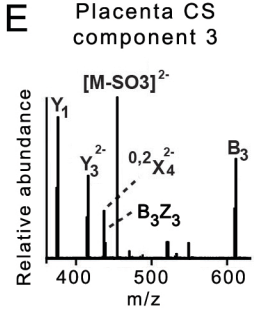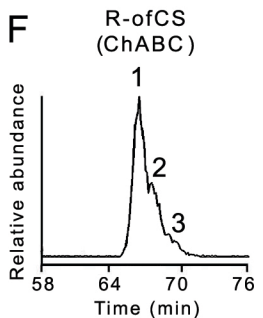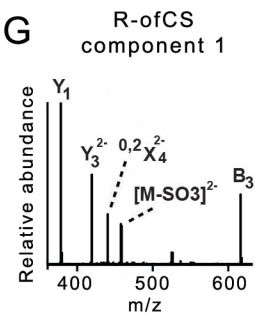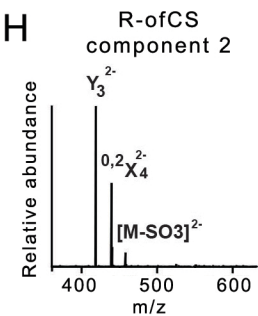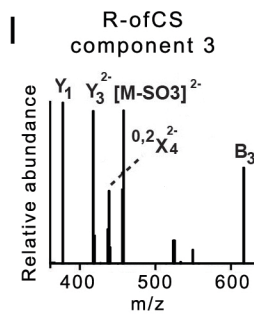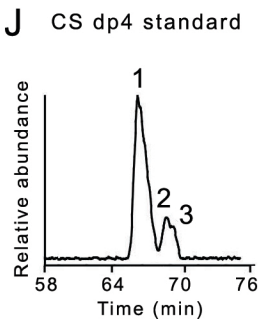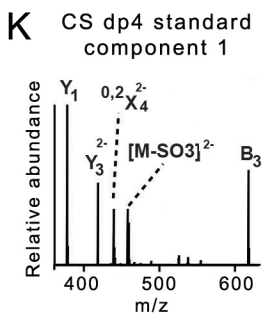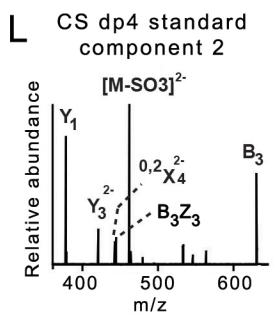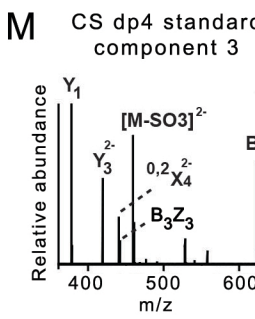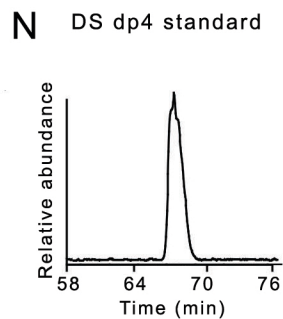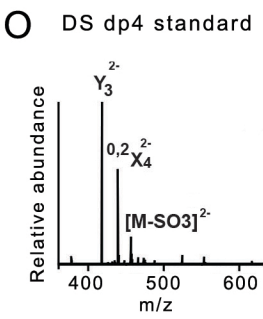

Supplement: mmc2.pdf [file mmc2.pdf]

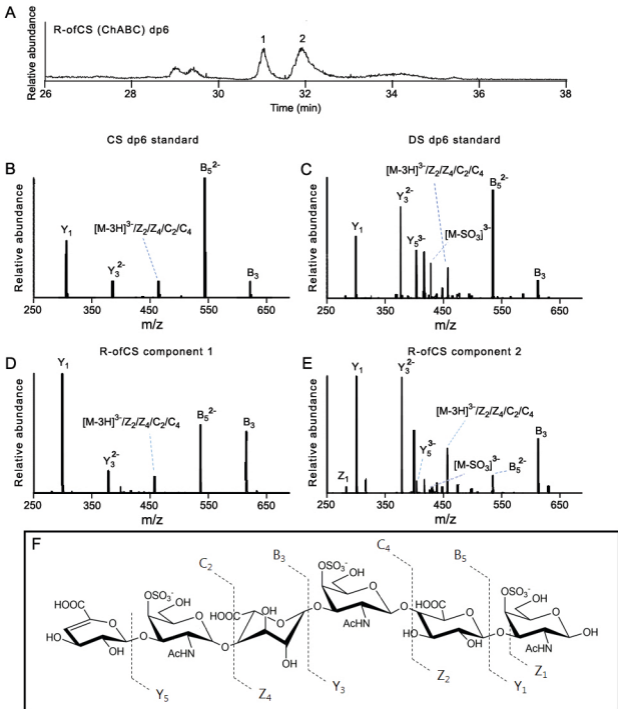

Supplement: mmc3.pdf [file mmc3.pdf]

A

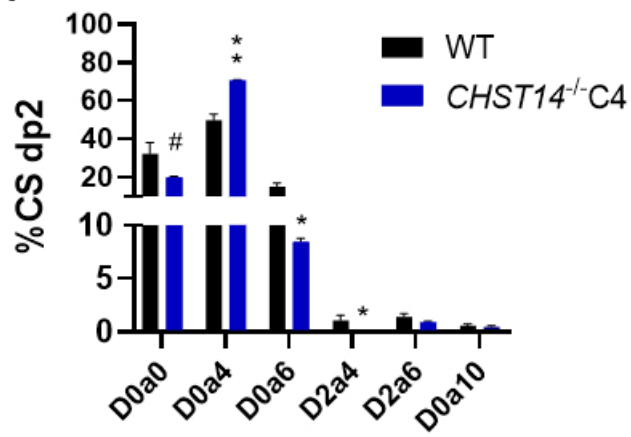

B

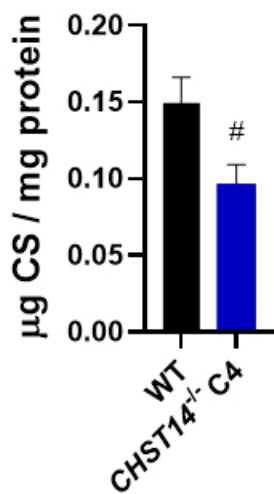

C

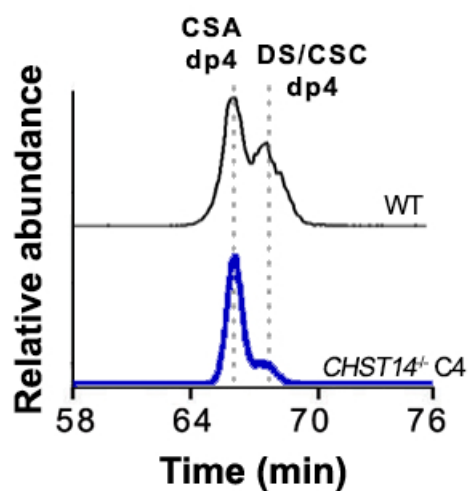

D

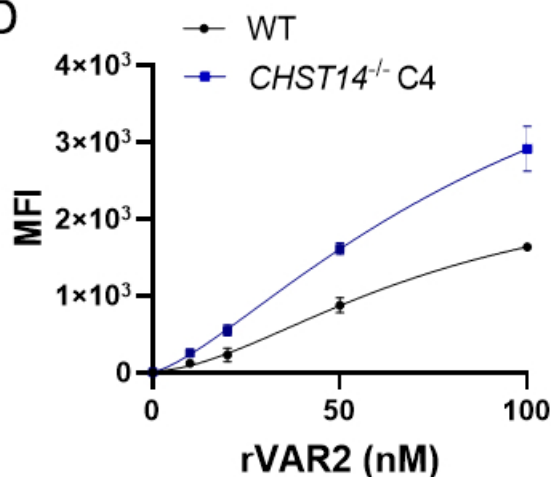

Supplement: mmc5.pdf [file mmc5.pdf]

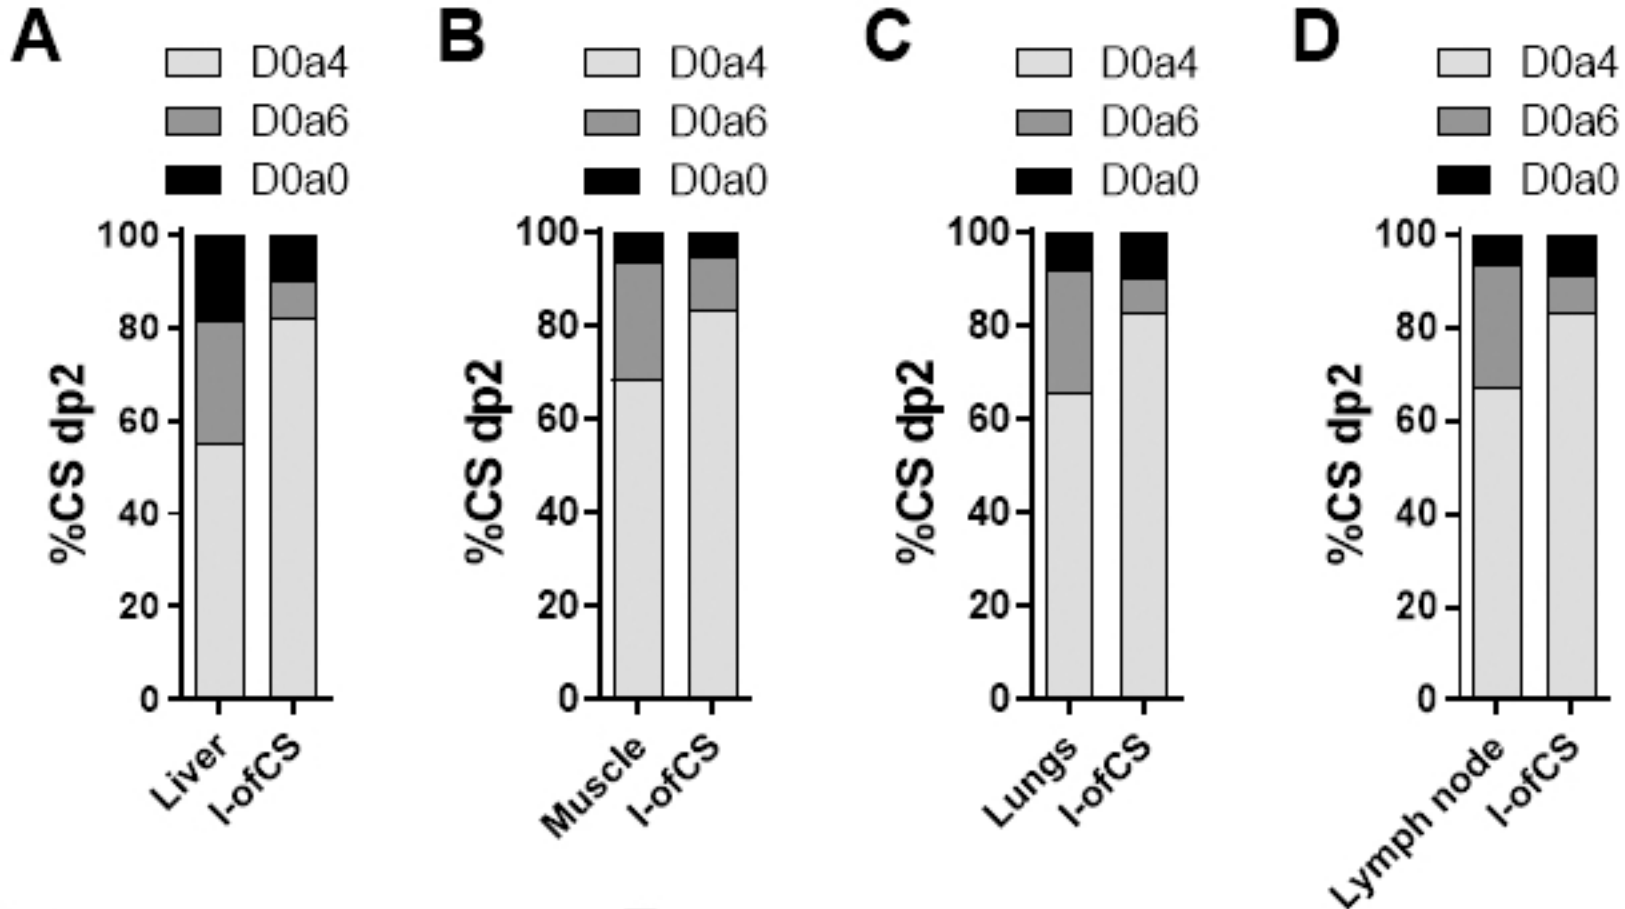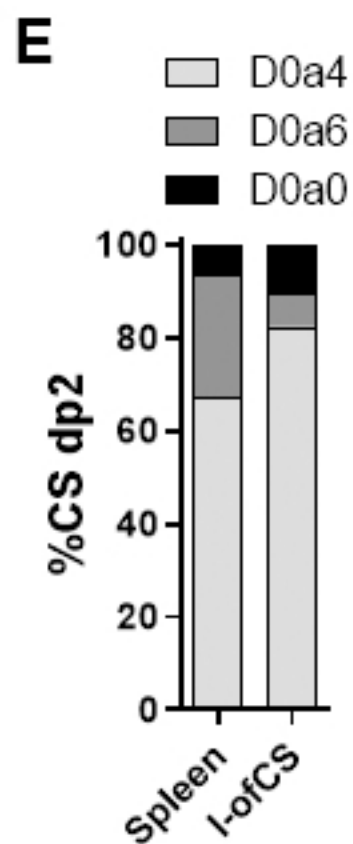

**F**

| Sample     | I-ofCS purified |
|------------|-----------------|
| Placenta   | 15.6%           |
| Liver      | 4.2%            |
| Muscle     | 5.8%            |
| Lung       | 7.2%            |
| Lymph node | 7.0%            |
| Spleen     | 5.6%            |

Supplement: mmc6.pdf [file mmc6.pdf]
